# Supplementary material for: Proteome-wide and lysine crotonylation profiling reveals the importance of crotonylation in chrysanthemum (Dendranthema grandiforum) under low-temperature
Source: BMC Genomics. 2021 Jan 14;22:51. doi: 10.1186/s12864-020-07365-5 (PMC7809856; doi:10.1186/s12864-020-07365-5)
Supplement: Supplementary file 5 — Additional file 5: Table S3. Segmentation results of GO annotation. [file 12864_2020_7365_MOESM5_ESM.xlsx]

## Sheet: Up Classification
GO Terms Level 1	GO Terms Level 3	No. of Protein	Protein IDs
Biological Process	primary metabolic process	16	Cluster-2961.152706 Cluster-2961.140229 Cluster-2961.134558 Cluster-2961.174264 Cluster-2961.166522 Cluster-2961.145901 Cluster-2961.140533 Cluster-2961.187492 Cluster-2961.143731 Cluster-2961.163042 Cluster-2961.188751 Cluster-2961.144772 Cluster-2961.149869 Cluster-2961.136917 Cluster-2961.187754 Cluster-2961.99283
	organic substance metabolic process	16	Cluster-2961.152706 Cluster-2961.140229 Cluster-2961.134558 Cluster-2961.174264 Cluster-2961.166522 Cluster-2961.145901 Cluster-2961.140533 Cluster-2961.187492 Cluster-2961.143731 Cluster-2961.163042 Cluster-2961.188751 Cluster-2961.144772 Cluster-2961.149869 Cluster-2961.136917 Cluster-2961.187754 Cluster-2961.99283
	nitrogen compound metabolic process	15	Cluster-2961.187492 Cluster-2961.143731 Cluster-2961.163042 Cluster-2961.144772 Cluster-2961.188751 Cluster-2961.149869 Cluster-2961.187754 Cluster-2961.152706 Cluster-2961.136917 Cluster-2961.140229 Cluster-2961.174264 Cluster-2961.99283 Cluster-2961.166522 Cluster-2961.145901 Cluster-2961.140533
	biosynthetic process	15	Cluster-2961.187492 Cluster-2961.143731 Cluster-2961.163042 Cluster-2961.144772 Cluster-2961.188751 Cluster-2961.149869 Cluster-2961.187754 Cluster-2961.152706 Cluster-2961.136917 Cluster-2961.140229 Cluster-2961.174264 Cluster-2961.99283 Cluster-2961.166522 Cluster-2961.145901 Cluster-2961.140533
	cellular metabolic process	15	Cluster-2961.187492 Cluster-2961.143731 Cluster-2961.163042 Cluster-2961.144772 Cluster-2961.188751 Cluster-2961.149869 Cluster-2961.187754 Cluster-2961.152706 Cluster-2961.136917 Cluster-2961.140229 Cluster-2961.174264 Cluster-2961.99283 Cluster-2961.166522 Cluster-2961.145901 Cluster-2961.140533
	single-organism metabolic process	3	Cluster-2961.118397 Cluster-2961.144772 Cluster-2961.145901
	cellular component biogenesis	2	Cluster-2961.50886 Cluster-2961.142407
	response to stress	2	Cluster-2961.110221 Cluster-2961.176219
	single-organism cellular process	2	Cluster-2961.144772 Cluster-2961.145901
	cellular component organization	1	Cluster-2961.50886
	regulation of biological process	1	Cluster-2961.136917
	single-organism localization	1	Cluster-2961.145901
	response to biotic stimulus	1	Cluster-2961.176219
	establishment of localization	1	Cluster-2961.145901
Cellular Component	ribonucleoprotein complex	13	Cluster-2961.187492 Cluster-2961.143731 Cluster-2961.163042 Cluster-2961.188751 Cluster-2961.149869 Cluster-2961.187754 Cluster-2961.152706 Cluster-2961.140229 Cluster-2961.174264 Cluster-2961.142407 Cluster-2961.99283 Cluster-2961.166522 Cluster-2961.140533
	non-membrane-bounded organelle	13	Cluster-2961.187492 Cluster-2961.143731 Cluster-2961.50886 Cluster-2961.163042 Cluster-2961.188751 Cluster-2961.149869 Cluster-2961.187754 Cluster-2961.152706 Cluster-2961.140229 Cluster-2961.174264 Cluster-2961.99283 Cluster-2961.166522 Cluster-2961.140533
	protein complex	1	Cluster-2961.145901
	membrane-bounded organelle	1	Cluster-2961.50886
	protein-DNA complex	1	Cluster-2961.50886
	DNA packaging complex	1	Cluster-2961.50886
Molecular Function	structural constituent of ribosome	12	Cluster-2961.187492 Cluster-2961.143731 Cluster-2961.163042 Cluster-2961.188751 Cluster-2961.149869 Cluster-2961.187754 Cluster-2961.152706 Cluster-2961.140229 Cluster-2961.174264 Cluster-2961.99283 Cluster-2961.166522 Cluster-2961.140533
	heterocyclic compound binding	4	Cluster-2961.50886 Cluster-2961.163042 Cluster-2961.99283 Cluster-2961.136917
	organic cyclic compound binding	4	Cluster-2961.50886 Cluster-2961.163042 Cluster-2961.99283 Cluster-2961.136917
	hydrolase activity	2	Cluster-2961.183847 Cluster-2961.134558
	oxidoreductase activity	2	Cluster-2961.118397 Cluster-2961.144772
	macromolecular complex binding	1	Cluster-2961.136917
	ion binding	1	Cluster-2961.183847
	substrate-specific transporter activity	1	Cluster-2961.145901
	protein binding	1	Cluster-2961.162353
	transferase activity	1	Cluster-2961.118840
	small molecule binding	1	Cluster-2961.163042
	transmembrane transporter activity	1	Cluster-2961.145901
	metal cluster binding	1	Cluster-2961.118397

## Sheet: Down Classification
GO Terms Level 1	GO Terms Level 3	No. of Protein	Protein IDs
Biological Process	single-organism metabolic process	9	Cluster-2961.131724 Cluster-2961.236947 Cluster-2961.142421 Cluster-2961.182645 Cluster-2961.106632 Cluster-2961.179312 Cluster-2961.149178 Cluster-2961.119499 Cluster-2961.161823
	cellular metabolic process	7	Cluster-2961.94330 Cluster-2961.196431 Cluster-2961.106632 Cluster-2961.131724 Cluster-2961.236947 Cluster-2961.149178 Cluster-2961.161823
	primary metabolic process	6	Cluster-2961.94330 Cluster-2961.236947 Cluster-2961.179312 Cluster-2961.149178 Cluster-2961.161823 Cluster-2961.136371
	organic substance metabolic process	6	Cluster-2961.94330 Cluster-2961.236947 Cluster-2961.179312 Cluster-2961.149178 Cluster-2961.161823 Cluster-2961.136371
	single-organism cellular process	4	Cluster-2961.236947 Cluster-2961.149178 Cluster-2961.161823 Cluster-2961.182645
	nitrogen compound metabolic process	4	Cluster-2961.94330 Cluster-2961.236947 Cluster-2961.149178 Cluster-2961.161823
	response to stress	2	Cluster-2961.188262 Cluster-2961.131724
	biosynthetic process	2	Cluster-2961.94330 Cluster-2961.149178
	protein folding	2	Cluster-2961.149031 Cluster-2961.151357
	catabolic process	2	Cluster-2961.131724 Cluster-2961.236947
	cellular component biogenesis	1	Cluster-2961.121248
	cellular component organization	1	Cluster-2961.121248
	single-multicellular organism process	1	Cluster-2961.155210
	regulation of biological quality	1	Cluster-2961.182645
	establishment of localization	1	Cluster-2961.161497
	response to biotic stimulus	1	Cluster-2961.188262
	regulation of biological process	1	Cluster-2961.182645
	single-organism developmental process	1	Cluster-2961.155210
	anatomical structure development	1	Cluster-2961.155210
Cellular Component	non-membrane-bounded organelle	1	Cluster-2961.121248
	catalytic complex	1	Cluster-2961.236947
	membrane-bounded organelle	1	Cluster-2961.121248
	protein complex	1	Cluster-2961.196431
	protein-DNA complex	1	Cluster-2961.121248
	DNA packaging complex	1	Cluster-2961.121248
Molecular Function	ion binding	11	Cluster-2961.236947 Cluster-2961.161497 Cluster-2961.136371 Cluster-2961.182645 Cluster-2961.94330 Cluster-2961.149031 Cluster-2961.106632 Cluster-2961.119499 Cluster-2961.161823 Cluster-2961.151357 Cluster-2961.286301
	heterocyclic compound binding	11	Cluster-2961.121248 Cluster-2961.131724 Cluster-2961.161497 Cluster-2961.136371 Cluster-2961.182645 Cluster-2961.94330 Cluster-2961.149031 Cluster-2961.119499 Cluster-2961.161823 Cluster-2961.151357 Cluster-2961.286301
	organic cyclic compound binding	11	Cluster-2961.121248 Cluster-2961.131724 Cluster-2961.161497 Cluster-2961.136371 Cluster-2961.182645 Cluster-2961.94330 Cluster-2961.149031 Cluster-2961.119499 Cluster-2961.161823 Cluster-2961.151357 Cluster-2961.286301
	small molecule binding	6	Cluster-2961.94330 Cluster-2961.149031 Cluster-2961.151357 Cluster-2961.136371 Cluster-2961.286301 Cluster-2961.182645
	oxidoreductase activity	5	Cluster-2961.106632 Cluster-2961.131724 Cluster-2961.149178 Cluster-2961.119499 Cluster-2961.182645
	carbohydrate derivative binding	5	Cluster-2961.94330 Cluster-2961.149031 Cluster-2961.151357 Cluster-2961.136371 Cluster-2961.286301
	cofactor binding	3	Cluster-2961.161823 Cluster-2961.161497 Cluster-2961.182645
	protein binding	2	Cluster-2961.125789 Cluster-2961.140879
	enzyme regulator activity	2	Cluster-2961.259305 Cluster-2961.210034
	lyase activity	1	Cluster-2961.236947
	hydrolase activity	1	Cluster-2961.94330
	isomerase activity	1	Cluster-2961.179312
	carbohydrate binding	1	Cluster-2961.179312
	transferase activity	1	Cluster-2961.161823
	transmembrane transporter activity	1	Cluster-2961.161497

## Sheet: all Classification
GO Terms Level 1	GO Terms Level 3	No. of Protein	Protein IDs
Biological Process	primary metabolic process	22	Cluster-2961.136371 Cluster-2961.152706 Cluster-2961.94330 Cluster-2961.140229 Cluster-2961.134558 Cluster-2961.174264 Cluster-2961.179312 Cluster-2961.161823 Cluster-2961.166522 Cluster-2961.145901 Cluster-2961.140533 Cluster-2961.187492 Cluster-2961.143731 Cluster-2961.236947 Cluster-2961.163042 Cluster-2961.144772 Cluster-2961.188751 Cluster-2961.149869 Cluster-2961.187754 Cluster-2961.136917 …
	cellular metabolic process	22	Cluster-2961.196431 Cluster-2961.131724 Cluster-2961.152706 Cluster-2961.94330 Cluster-2961.106632 Cluster-2961.140229 Cluster-2961.174264 Cluster-2961.161823 Cluster-2961.166522 Cluster-2961.145901 Cluster-2961.140533 Cluster-2961.187492 Cluster-2961.143731 Cluster-2961.236947 Cluster-2961.163042 Cluster-2961.144772 Cluster-2961.188751 Cluster-2961.149869 Cluster-2961.136917 Cluster-2961.187754 …
	organic substance metabolic process	22	Cluster-2961.136371 Cluster-2961.152706 Cluster-2961.94330 Cluster-2961.140229 Cluster-2961.134558 Cluster-2961.174264 Cluster-2961.179312 Cluster-2961.161823 Cluster-2961.166522 Cluster-2961.145901 Cluster-2961.140533 Cluster-2961.187492 Cluster-2961.143731 Cluster-2961.236947 Cluster-2961.163042 Cluster-2961.144772 Cluster-2961.188751 Cluster-2961.149869 Cluster-2961.187754 Cluster-2961.136917 …
	nitrogen compound metabolic process	19	Cluster-2961.152706 Cluster-2961.94330 Cluster-2961.140229 Cluster-2961.174264 Cluster-2961.161823 Cluster-2961.166522 Cluster-2961.145901 Cluster-2961.140533 Cluster-2961.187492 Cluster-2961.143731 Cluster-2961.236947 Cluster-2961.163042 Cluster-2961.144772 Cluster-2961.188751 Cluster-2961.149869 Cluster-2961.136917 Cluster-2961.187754 Cluster-2961.149178 Cluster-2961.99283
	biosynthetic process	17	Cluster-2961.152706 Cluster-2961.94330 Cluster-2961.140229 Cluster-2961.174264 Cluster-2961.166522 Cluster-2961.145901 Cluster-2961.140533 Cluster-2961.187492 Cluster-2961.143731 Cluster-2961.163042 Cluster-2961.144772 Cluster-2961.188751 Cluster-2961.149869 Cluster-2961.136917 Cluster-2961.187754 Cluster-2961.149178 Cluster-2961.99283
	single-organism metabolic process	12	Cluster-2961.131724 Cluster-2961.236947 Cluster-2961.142421 Cluster-2961.144772 Cluster-2961.182645 Cluster-2961.106632 Cluster-2961.118397 Cluster-2961.179312 Cluster-2961.149178 Cluster-2961.119499 Cluster-2961.161823 Cluster-2961.145901
	single-organism cellular process	6	Cluster-2961.236947 Cluster-2961.149178 Cluster-2961.144772 Cluster-2961.161823 Cluster-2961.182645 Cluster-2961.145901
	response to stress	4	Cluster-2961.188262 Cluster-2961.110221 Cluster-2961.131724 Cluster-2961.176219
	cellular component biogenesis	3	Cluster-2961.121248 Cluster-2961.50886 Cluster-2961.142407
	cellular component organization	2	Cluster-2961.121248 Cluster-2961.50886
	establishment of localization	2	Cluster-2961.161497 Cluster-2961.145901
	response to biotic stimulus	2	Cluster-2961.188262 Cluster-2961.176219
	protein folding	2	Cluster-2961.149031 Cluster-2961.151357
	regulation of biological process	2	Cluster-2961.182645 Cluster-2961.136917
	catabolic process	2	Cluster-2961.131724 Cluster-2961.236947
	other	3	Cluster-2961.155210 Cluster-2961.145901 Cluster-2961.182645
Cellular Component	non-membrane-bounded organelle	14	Cluster-2961.187492 Cluster-2961.143731 Cluster-2961.121248 Cluster-2961.50886 Cluster-2961.163042 Cluster-2961.188751 Cluster-2961.149869 Cluster-2961.187754 Cluster-2961.152706 Cluster-2961.140229 Cluster-2961.174264 Cluster-2961.99283 Cluster-2961.166522 Cluster-2961.140533
	ribonucleoprotein complex	13	Cluster-2961.187492 Cluster-2961.143731 Cluster-2961.163042 Cluster-2961.188751 Cluster-2961.149869 Cluster-2961.187754 Cluster-2961.152706 Cluster-2961.140229 Cluster-2961.174264 Cluster-2961.142407 Cluster-2961.99283 Cluster-2961.166522 Cluster-2961.140533
	protein complex	2	Cluster-2961.196431 Cluster-2961.145901
	membrane-bounded organelle	2	Cluster-2961.121248 Cluster-2961.50886
	protein-DNA complex	2	Cluster-2961.121248 Cluster-2961.50886
	DNA packaging complex	2	Cluster-2961.121248 Cluster-2961.50886
	catalytic complex	1	Cluster-2961.236947
Molecular Function	organic cyclic compound binding	15	Cluster-2961.121248 Cluster-2961.50886 Cluster-2961.131724 Cluster-2961.163042 Cluster-2961.161497 Cluster-2961.136371 Cluster-2961.182645 Cluster-2961.136917 Cluster-2961.94330 Cluster-2961.149031 Cluster-2961.119499 Cluster-2961.99283 Cluster-2961.161823 Cluster-2961.151357 Cluster-2961.286301
	heterocyclic compound binding	15	Cluster-2961.121248 Cluster-2961.50886 Cluster-2961.131724 Cluster-2961.163042 Cluster-2961.161497 Cluster-2961.136371 Cluster-2961.182645 Cluster-2961.136917 Cluster-2961.94330 Cluster-2961.149031 Cluster-2961.119499 Cluster-2961.99283 Cluster-2961.161823 Cluster-2961.151357 Cluster-2961.286301
	ion binding	12	Cluster-2961.183847 Cluster-2961.236947 Cluster-2961.161497 Cluster-2961.136371 Cluster-2961.182645 Cluster-2961.94330 Cluster-2961.149031 Cluster-2961.106632 Cluster-2961.119499 Cluster-2961.161823 Cluster-2961.151357 Cluster-2961.286301
	structural constituent of ribosome	12	Cluster-2961.187492 Cluster-2961.143731 Cluster-2961.163042 Cluster-2961.188751 Cluster-2961.149869 Cluster-2961.187754 Cluster-2961.152706 Cluster-2961.140229 Cluster-2961.174264 Cluster-2961.99283 Cluster-2961.166522 Cluster-2961.140533
	oxidoreductase activity	7	Cluster-2961.106632 Cluster-2961.118397 Cluster-2961.131724 Cluster-2961.149178 Cluster-2961.144772 Cluster-2961.119499 Cluster-2961.182645
	small molecule binding	7	Cluster-2961.94330 Cluster-2961.149031 Cluster-2961.163042 Cluster-2961.151357 Cluster-2961.136371 Cluster-2961.286301 Cluster-2961.182645
	carbohydrate derivative binding	5	Cluster-2961.94330 Cluster-2961.149031 Cluster-2961.151357 Cluster-2961.136371 Cluster-2961.286301
	protein binding	3	Cluster-2961.125789 Cluster-2961.162353 Cluster-2961.140879
	hydrolase activity	3	Cluster-2961.183847 Cluster-2961.94330 Cluster-2961.134558
	cofactor binding	3	Cluster-2961.161823 Cluster-2961.161497 Cluster-2961.182645
	enzyme regulator activity	2	Cluster-2961.259305 Cluster-2961.210034
	transferase activity	2	Cluster-2961.161823 Cluster-2961.118840
	transmembrane transporter activity	2	Cluster-2961.161497 Cluster-2961.145901
	macromolecular complex binding	1	Cluster-2961.136917
	substrate-specific transporter activity	1	Cluster-2961.145901
	lyase activity	1	Cluster-2961.236947
	isomerase activity	1	Cluster-2961.179312
	carbohydrate binding	1	Cluster-2961.179312
	metal cluster binding	1	Cluster-2961.118397
